# Supplementary material for: Cell penetrating peptide-based polyplexes shelled with polysaccharide to improve stability and gene transfection
Source: Royal Society of Chemistry journal article supplement (doi:10.1039/c4nr07037b), 2015-01-01
Supplement: c4nr07037b1.pdf [file c4nr07037b1.pdf]

## **Electronic Supplementary Information**

# **Cell penetrating peptide-based polyplexes shelled with polysaccharide to improve stability and gene transfection†**

Wenyu Li, Yajie Liu, Jianwei Du, Kefeng Ren, Youxiang Wang\*

MOE key Laboratory of Macromolecular Synthesis and Functionalization,  
Department of Polymer Science and Engineering, Zhejiang University, Hangzhou  
310027, P. R. China. Tel. /fax: +86 571 87953729;

E-mail address: [yx\\_wang@zju.edu.cn](mailto:yx_wang@zju.edu.cn)

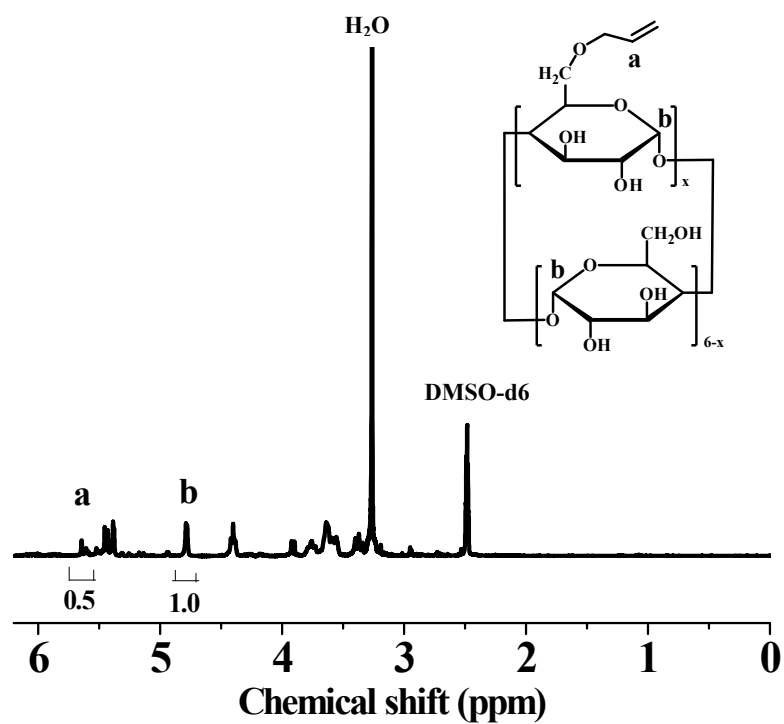

Figure S1  $^1\text{H}$  NMR spectrum of allyl- $\alpha$ -CD.

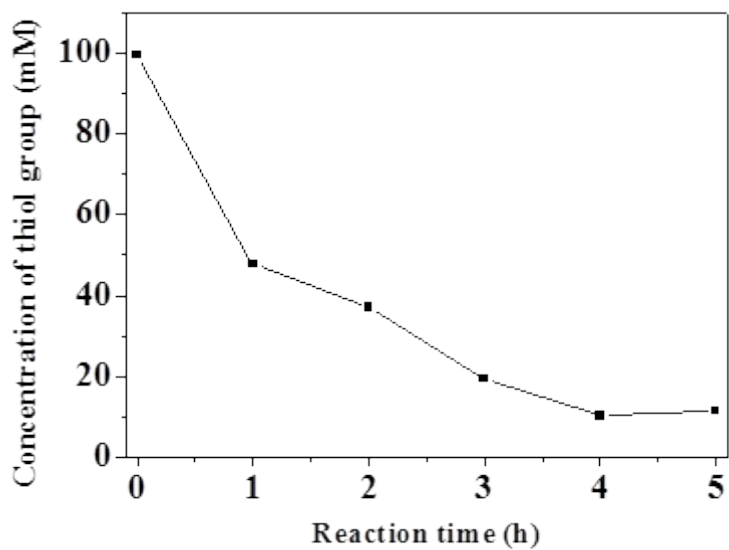

Figure S2. The consumption of thiol group in the system.

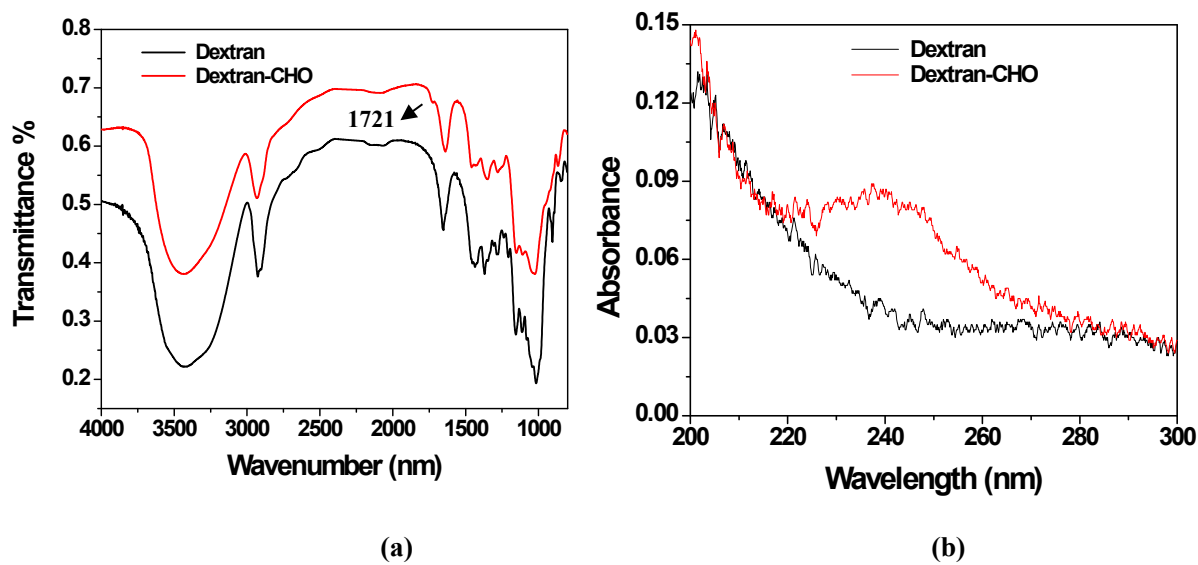

Figure S3 FT-IR (a) and UV-vis (b) spectra of Dextran and Dex-CHO.

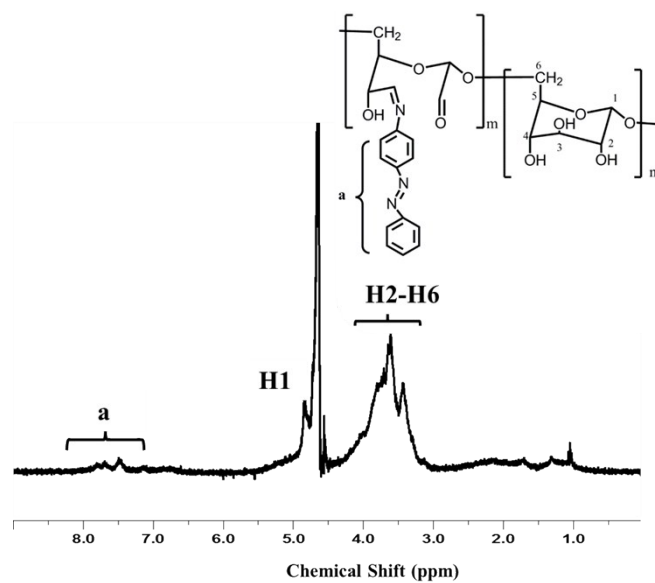

Figure S4  $^1\text{H}$  NMR spectrum of Az-I-Dex.

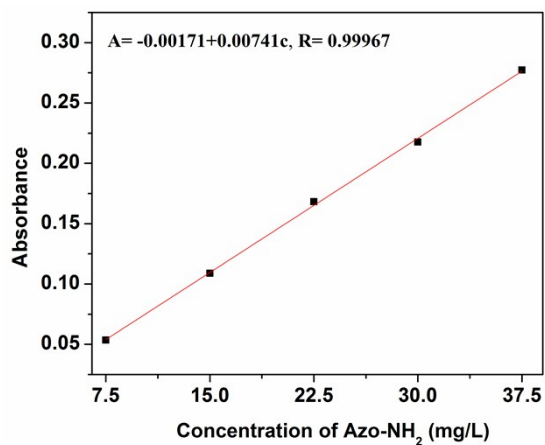

**Figure S5** The standard curve of 4-aminoazobenzene obtained by UV-vis spectra.

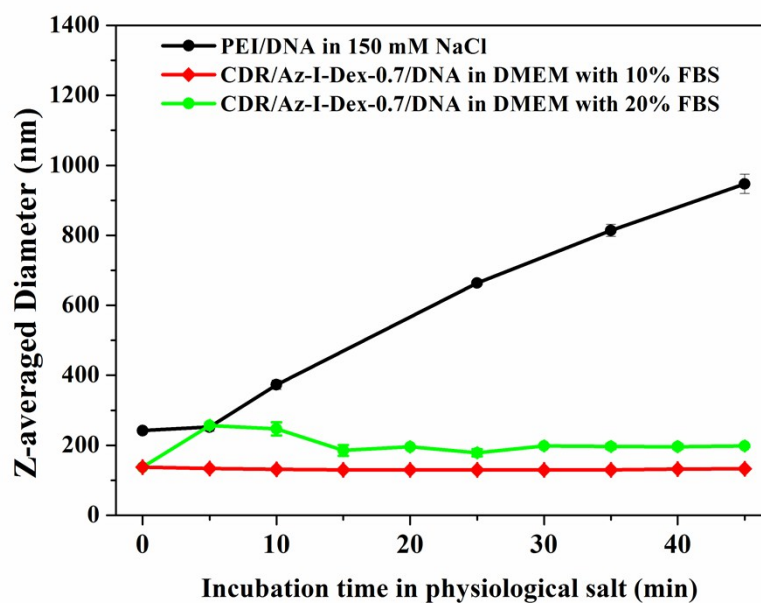

**Figure S6** The Size change of various polyplexes at C/P ratio of 10 in the presence of the culture media with 10% or 20% FBS.
